# Supplementary material
Source: MDPI journal article supplement (https://www.mdpi.com/2076-3298/9/11/140)
Supplement: s1 [file s1]

## Article

# Effects of Microplastic on Human Gut Microbiome: Detection of Plastic-Degrading Genes in Human Gut Exposed to Microplastics—Preliminary Study

Husna Nugrahapraja <sup>1,2</sup>, Pramudya Wisnu Wicaksono Sugiyo <sup>3</sup>, Balqis Qonita Putri <sup>3</sup>, Ni'matuzahroh <sup>3,4</sup>, Fatimah <sup>3,4</sup>, Li Huang <sup>5</sup>, Nourhane Hafza <sup>6</sup>, Friedrich Götz <sup>6</sup>, Heri Santoso <sup>7</sup>, Anjar Tri Wibowo <sup>3,\*</sup> and Arif Luqman <sup>8,\*</sup>

<sup>1</sup> University Center of Excellence for Nutraceuticals, Bioscience and Biotechnology Research Center, Institut Teknologi Bandung, Bandung 40132, Indonesia

<sup>2</sup> School of Life Sciences and Technology, Institut Teknologi Bandung, Bandung 40132, Indonesia

<sup>3</sup> Department of Biology, Faculty of Science and Technology, Airlangga University, Surabaya 60115, Indonesia

<sup>4</sup> University CoE Research Center for Bio-Molecule Engineering, Universitas Airlangga, Surabaya 60115, Indonesia

<sup>5</sup> Department of Preventive Veterinary Medicine, College of Animal and Veterinary Science, Southwest Minzu University, Chengdu 610093, China

<sup>6</sup> Microbial Genetics Department, Eberhard Karls University of Tuebingen, 72076 Tuebingen, Germany

<sup>7</sup> Generasi Biologi Indonesia (Genbinesia) Foundation, Gresik 61171, Indonesia

<sup>8</sup> Biology Department, Institut Teknologi Sepuluh Nopember, Surabaya 60111, Indonesia

\* Correspondence: anjar.tri@fst.unair.ac.id (A.T.W.); arif.luqman@its.ac.id (A.L.)

**Table S1.** Accession numbers of the reference genes for read count analyses.

| No.                                            | Gene         | Product                                                                                                                      | Accession number    |
|------------------------------------------------|--------------|------------------------------------------------------------------------------------------------------------------------------|---------------------|
| 1                                              | <i>rpoB</i>  | RNA Polymerase subunit beta                                                                                                  | NZ_QRKQ01000009.1   |
| <b>Gut health-related genes</b>                |              |                                                                                                                              |                     |
| 2                                              | <i>scpC</i>  | Propionate production from succinate                                                                                         | NC_000913.3         |
| 3                                              | <i>bglX</i>  | beta-glucosidase                                                                                                             | NZ_QRKQ01000013.1   |
| 4                                              | <i>but</i>   | butyryl-CoA:acetate CoA-transferase (butyrate production)                                                                    | NZ_VWSY01000001.1   |
| 5                                              | <i>Ato</i>   | butyryl-CoA:acetoacetate CoA-transferase subunit alpha                                                                       | NC_014633.1         |
| 6                                              | <i>buk</i>   | butyrate kinase (butyrate production)                                                                                        | NZ_VVYQ01000024.1   |
| 7                                              | <i>adhE</i>  | bifunctional acetaldehyde-CoA/alcohol dehydrogenase (acetate production)                                                     | NZ_CP011663.1       |
| 8                                              | <i>ilvE</i>  | branched-chain-amino-acid aminotransferase                                                                                   | NC_000913.3         |
| 9                                              | <i>cutD</i>  | choline TMA-lyase-activating enzyme                                                                                          | NZ_KE136504.1       |
| 10                                             | <i>torT</i>  | TMAO reductase system periplasmic protein TorT                                                                               | NZ_JABTBL01000001.1 |
| 11                                             |              | tryptophanase                                                                                                                | NC_008593.1         |
| <b>Plastic degrading enzyme-encoding genes</b> |              |                                                                                                                              |                     |
| 12                                             | <i>pbsA</i>  | poly(tetramethylene succinate) depolymerase (Polybutylene succinate and poly((tetramethylsuccinate)-co-adipate) degradation) | AB066349.1          |
| 13                                             | <i>cutA</i>  | Cutinase A precursor (polyester degradation)                                                                                 | KU695574.1          |
| 14                                             | <i>alkA</i>  | aromatic/alkene/methane monooxygenase hydroxylase/oxygenase subunit alpha (LMWPE degradation)                                | NZ_CP022562.1       |
| 15                                             | <i>alkB</i>  | aromatic/alkene monooxygenase hydroxylase subunit beta (LMWPE degradation)                                                   | NZ_CP022562.1       |
| 16                                             | <i>cut1</i>  | Cutinase                                                                                                                     | HQ147785.1          |
| 17                                             |              | Lipase/esterase                                                                                                              | NC_007333.1         |
| 18                                             | <i>MNP_1</i> | Manganese peroxidase                                                                                                         | LHYA1_G003107       |

|    |             |                                                                               |                               |
|----|-------------|-------------------------------------------------------------------------------|-------------------------------|
| 19 | <i>StyC</i> | styrene oxide isomerase                                                       | MBR_07180                     |
| 20 | <i>feaB</i> | phenylacetaldehyde dehydrogenase                                              | b1385, ECK1382                |
| 21 |             | Polyurethenase                                                                | HLB40_RS16045,<br>HLB40_16045 |
| 22 | <i>nylA</i> | 6-aminohexanoate-cyclic-dimer hydrolase (Nylon oligomers-degrading enzyme EI) | SALIVA_1117                   |
| 23 | <i>phaZ</i> | poly(3-hydroxyalkanoate) depolymerase                                         | HLB40_RS02110,<br>HLB40_02110 |
| 24 |             | PHB depolymerase family esterase                                              | AUP70_RS01860                 |

**Table S2.** Microplastic contamination level in human stool samples of coastal and highland populations in Indonesia. Data obtained from previous studies [21, 22].

| Code | Microplastic contamination level (µg/g feces) |             |             |              |              |             |
|------|-----------------------------------------------|-------------|-------------|--------------|--------------|-------------|
|      | HDPE                                          | LDPE        | PE          | PP           | PS           | PET         |
| C1   | 13,99 ± 3,95                                  | nd          | nd          | nd           | nd           | nd          |
| C2   | nd                                            | nd          | nd          | nd           | nd           | nd          |
| C3   | nd                                            | nd          | nd          | nd           | nd           | nd          |
| C4   | 7,19 ± 1,76                                   | nd          | nd          | 3,13 ± 0,51  | nd           | nd          |
| C5   | nd                                            | nd          | nd          | nd           | nd           | nd          |
| C6   | 12,27 ± 0,21                                  | nd          | 7,00 ± 1,25 | nd           | nd           | nd          |
| C7   | 3,33 ± 1,37                                   | nd          | nd          | nd           | nd           | nd          |
| C8   | nd                                            | nd          | nd          | nd           | nd           | nd          |
| C9   | nd                                            | nd          | nd          | nd           | nd           | nd          |
| C0   | nd                                            | nd          | nd          | nd           | 11,59 ± 2,56 | 2,44 ± 0,3  |
| C11  | nd                                            | 3,48 ± 1,25 | nd          | nd           | 8,18 ± 2,41  | nd          |
| H1   | nd                                            | nd          | nd          | nd           | nd           | 6,94 ± 2,56 |
| H2   | nd                                            | nd          | nd          | 3,95 ± 2,05  | 4,82 ± 1,41  | nd          |
| H3   | 13,77 ± 5,71                                  | nd          | nd          | nd           | 2,65 ± 1,28  | nd          |
| H4   | 0,52 ± 0,17                                   | nd          | nd          | 7,86 ± 1,28  | nd           | nd          |
| H5   | nd                                            | nd          | nd          | nd           | nd           | nd          |
| H6   | nd                                            | nd          | nd          | nd           | nd           | nd          |
| H7   | nd                                            | nd          | nd          | 12,40 ± 3,44 | nd           | nd          |
| H8   | nd                                            | nd          | nd          | 16,55 ± 5,96 | nd           | nd          |
| H9   | nd                                            | nd          | nd          | nd           | nd           | nd          |
| H10  | nd                                            | nd          | nd          | nd           | nd           | nd          |
| H11  | 15,62 ± 2,78                                  | nd          | nd          | nd           | nd           | nd          |

\*nd: not detected.

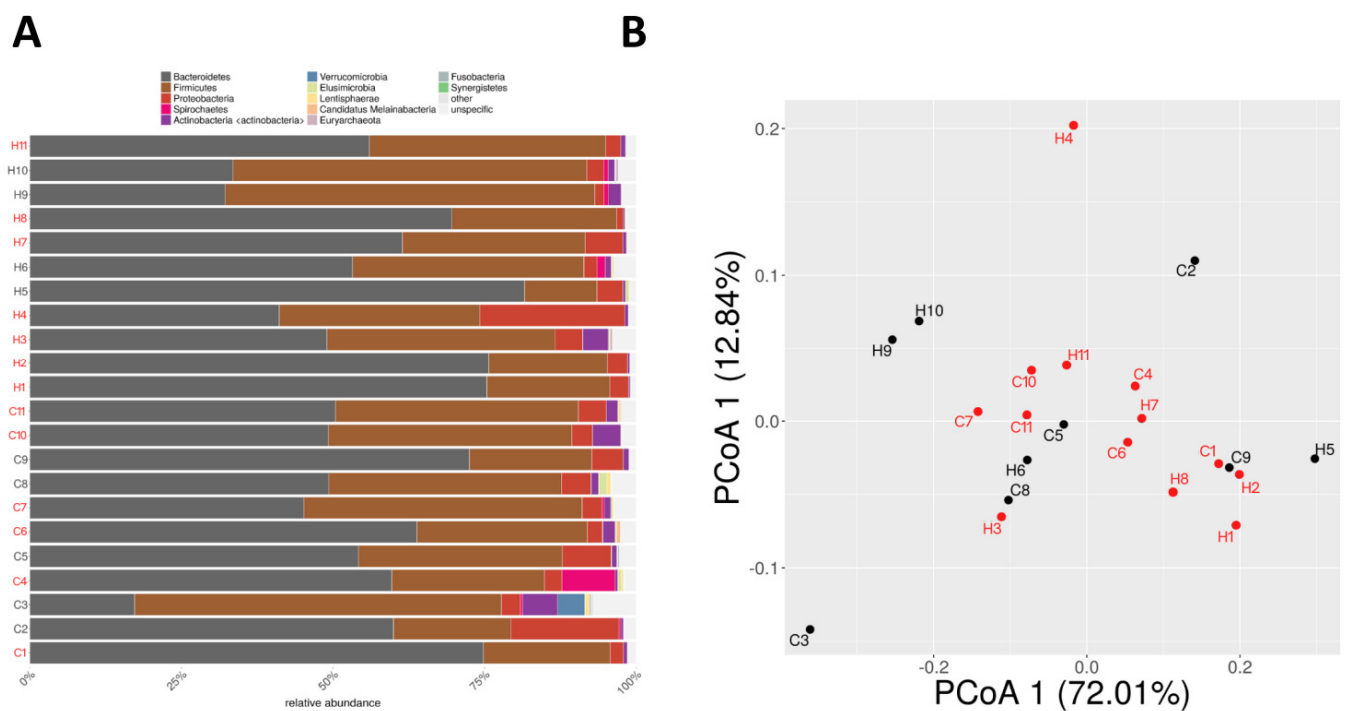

**Figure S1.** Gut microbiome profiles at the family level of Indonesian coastal and highland population that exposed to microplastics contamination.

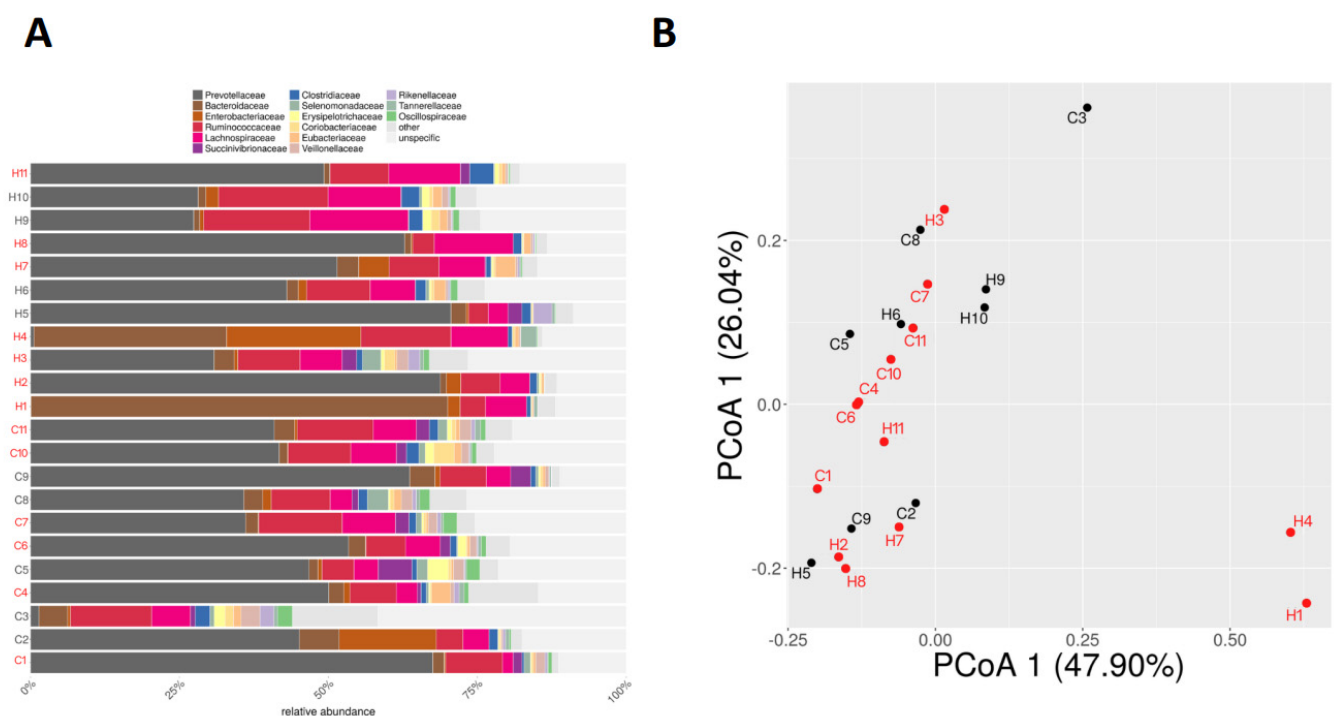

**Figure S2.** Gut microbiome profiles at the phylum level of Indonesian coastal and highland population that exposed to microplastics contamination.
